# Supplementary material for: A high performance lithium–selenium battery using a microporous carbon confined selenium cathode and a compatible electrolyte
Source: Royal Society of Chemistry journal article supplement (doi:10.1039/c7ta01564j), 2017-01-01
Supplement: c7ta01564j1.pdf [file c7ta01564j1.pdf]

Electronic Supplementary Information

**A high performance lithium-selenium batteries using microporous  
carbon confined selenium cathode and compatible electrolyte**

*Jingjing Zhou, Jun Yang\*, Zhixin Xu, Tao Zhang, Zhenying Chen and Jiulin*

*Wang\**

Shanghai Electrochemical Energy Devices Research Center,

School of Chemistry and Chemical Engineering, Shanghai Jiao Tong University,

Shanghai 200240, P. R. China

\*To whom all correspondence should be addressed. Email: yangj723@sjtu.edu.cn (J.

Yang); wangjiulin@sjtu.edu.cn (J.L. Wang)

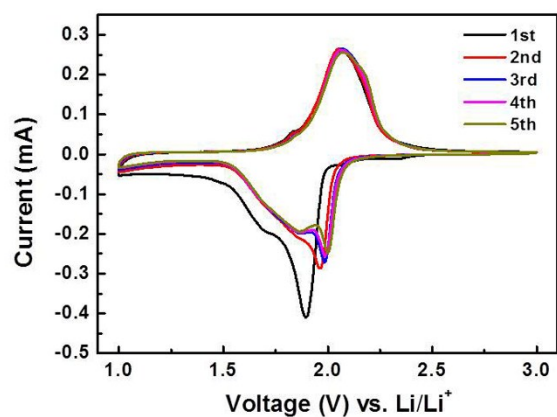

Figure S1. CV curves of the Se/MC electrode in LiDFOB/EC-DMC-FEC electrolyte at  $0.1 \text{ mV s}^{-1}$

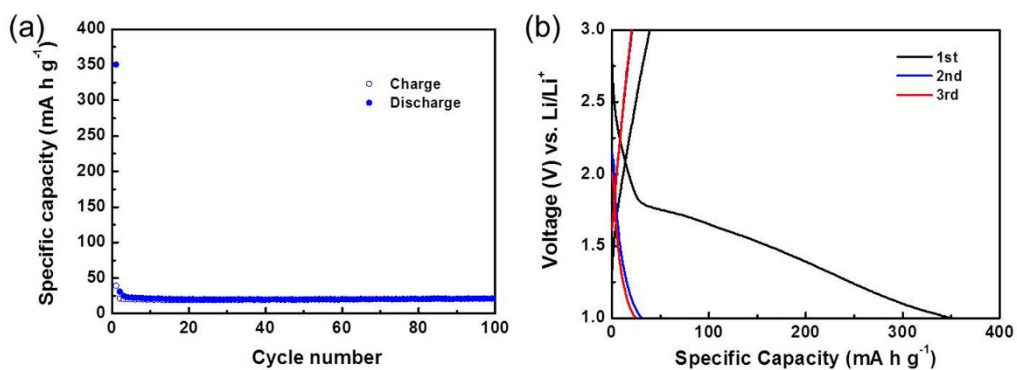

Figure S2. (a) Cycling performance and (b) galvanostatic charge-discharge profiles for the initial three cycles of MC at  $0.1 \text{ C}$  ( $67.8 \text{ mA g}^{-1}$ ) in the voltage range of  $1.0\text{-}3.0 \text{ V vs. Li/Li}^+$ .

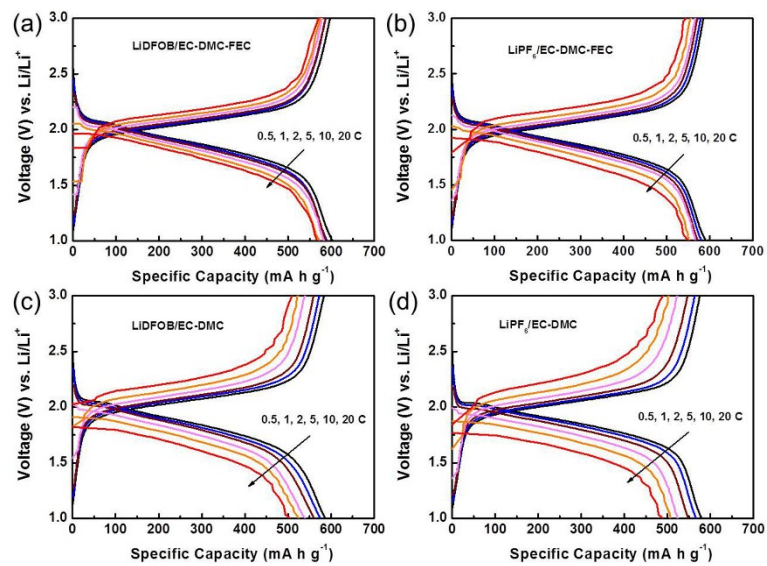

Figure S3. Galvanostatic charge-discharge profiles of Se/MC electrodes in (a)  $\text{LiDFOB/EC-DMC-FEC}$ , (b)  $\text{LiPF}_6/\text{EC-DMC-FEC}$ , (c)  $\text{LiDFOB/EC-DMC}$  and (d)  $\text{LiPF}_6/\text{EC-DMC}$  electrolytes at different currents.

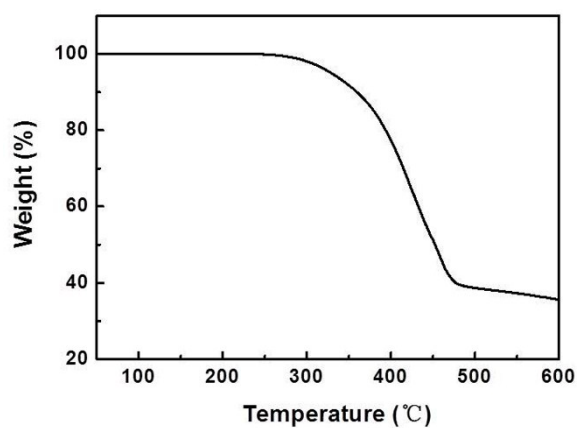

Figure S4. TGA curve of Se/MC composite with a high Se content of 64.7 wt%.

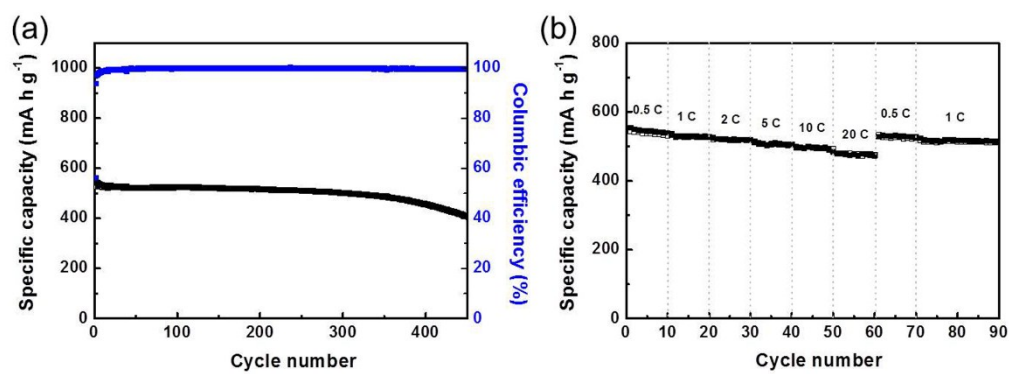

Figure S5. (a) Cycling at 1 C and (b) rate performance of Se/MC electrode with Se content of 64.7 wt% in LiDFOB/EC-DMC-FEC.

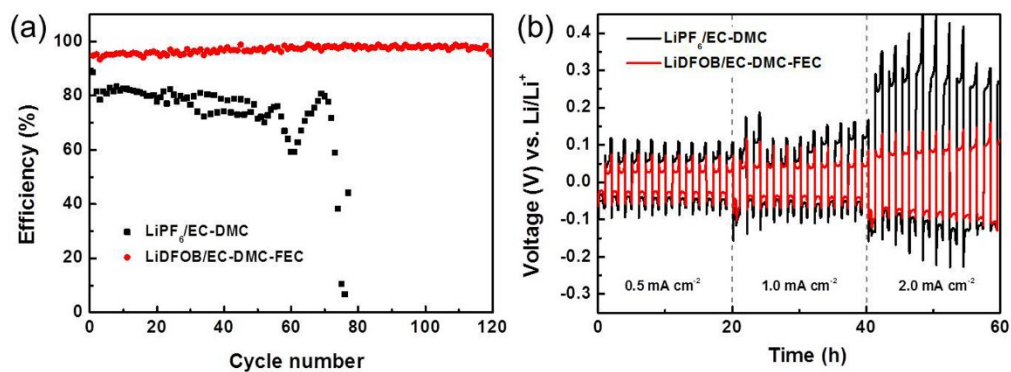

Figure S6. (a) Efficiency vs. cycle number for LiPF<sub>6</sub>/EC-DMC and LiDFOB/EC-DMC-FEC electrolytes at current density of 0.5 mA cm<sup>-2</sup> (The cycle condition: the constant Li deposition amount and complete Li stripping up to 1.0 V vs. Li/Li<sup>+</sup>). (b) Galvanostatic voltage-time curves for Li | Li symmetric cells in LiPF<sub>6</sub>/EC-DMC and LiDFOB/EC-DMC-FEC at constant current density of 0.5, 1.0 and 2.0 mA cm<sup>-2</sup> for 1 h per process.

Table S1. Comparison of cycling and rate performance of Li-Se batteries reported in the literatures

with this work

| Cathode material                             | Se content (wt%) | Cycling performance             |                                                                             | Rate performance              |                                                                  | Ref.      |
|----------------------------------------------|------------------|---------------------------------|-----------------------------------------------------------------------------|-------------------------------|------------------------------------------------------------------|-----------|
|                                              |                  | Current density                 | Final discharge capacity (mA h g <sup>-1</sup> <sub>Se</sub> )/cycle number | Current density               | Average discharge capacity (mA h g <sup>-1</sup> <sub>Se</sub> ) |           |
| Se/N-containing hierarchical porous carbon   | 56.2             | 2 C                             | 305/60                                                                      | 5 C                           | 261                                                              | 18        |
| Se/hollow carbon                             | 59.5             | 500 mA g <sup>-1</sup> (0.74 C) | 525/1000                                                                    | 2.0 A g <sup>-1</sup> (2.9 C) | 496                                                              | 21        |
| Se/carbonized polyacrylonitrile              | 36               | 1.5 C                           | ~400/1000                                                                   | 3 C                           | 290                                                              | 25        |
| carbon bonded and encapsulated Se composites | 54               | 100 mA g <sup>-1</sup>          | 430/250 (charge)                                                            | 1.2 A g <sup>-1</sup>         | 280                                                              | 27        |
| graphene/Se/poly aniline nanowires           | 66.18            | 0.2 C                           | 567.1/200                                                                   | 2 C                           | 510.9                                                            | 28        |
| Se@CN <sub>x</sub> nanobelts                 | 62.5             | 800 mA g <sup>-1</sup> (1.2 C)  | 453.2/400                                                                   | 1.6 A g <sup>-1</sup>         | 474                                                              | 26        |
| Se/porous carbon                             | 72               | 5 C                             | ~417/1000                                                                   | 20 C                          | 510                                                              | 11        |
| Se/porous carbon nanofibers                  | 52.3             | 500 mA g <sup>-1</sup>          | 516/900                                                                     | 4.0 A g <sup>-1</sup>         | 306                                                              | 22        |
| Se/porous carbon nanofiber webs              | 33.2             | 675 mA g <sup>-1</sup>          | 323.7/300                                                                   | -                             | -                                                                | 23        |
| Se/N-doped carbon tubes                      | 48               | 1 C                             | 365/100                                                                     | 3 C                           | 271                                                              | 35        |
| Se/macro and micro-porous carbon             | 56.1             | 0.2 C                           | 466.8/300                                                                   | 2 C                           | 421.0                                                            | 43        |
| Se/mesoporous carbon                         | 30               | 0.25 C                          | 480/1000                                                                    | 5 C                           | 229                                                              | 16        |
| Se/N-doped carbon sponges                    | 50               | 0.5 C                           | 443.2/200                                                                   | 5 C                           | 286.6                                                            | 46        |
| Se/microporous carbon                        | 51.4             | 5 C                             | 511/1000                                                                    | 20 C                          | 569                                                              | This work |

Table S2. The fitting values of the R2 shown in Fig. 6

| Parameter |         | LiDFOB/<br>EC-DMC-FEC | LiPF <sub>6</sub> /<br>EC-DMC-FEC | LiDFOB/<br>EC-DMC | LiPF <sub>6</sub> /<br>EC-DMC |
|-----------|---------|-----------------------|-----------------------------------|-------------------|-------------------------------|
| Fresh     | R2(ohm) | 43.6                  | 54.2                              | 86.5              | 87.4                          |
| 2nd       | R2(ohm) | 22.2                  | 39.2                              | 54.4              | 76.4                          |
| 20th      | R2(ohm) | 12.4                  | 12.5                              | 17.0              | 19.5                          |
